# Supplementary material
Source: publisher figshare collection journal article supplement (https://tandf.figshare.com/ndownloader/files/18089231)
Supplement: Supplementary file 1 [file 18089231]

Supplementary Figure 1. Proton NMR spectrum of isolated active constituent from *Strychnos potatorum* seeds.

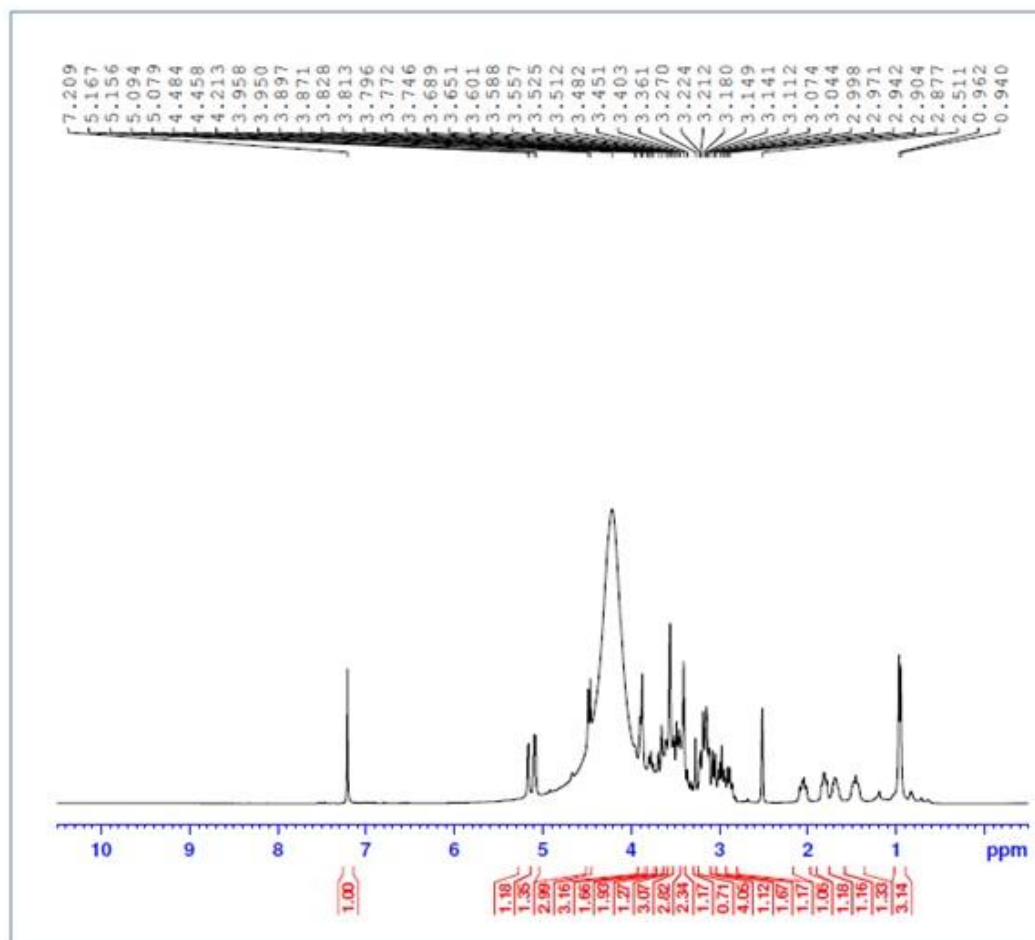

| H Position<br>(loganic acid) | $\delta$ H results of our study  | $\delta$ H results of previous study<br>(Zhang et al., 2003) |
|------------------------------|----------------------------------|--------------------------------------------------------------|
| 1                            | 5.12 ( <i>dd</i> , $J = 3.3$ Hz) | 5.41 ( <i>d</i> , $J = 3.6$ Hz)                              |
| 3                            | 7.21 ( <i>s</i> )                | 7.41 (1H, <i>s</i> )                                         |
| 5                            | 2.93 ( <i>m</i> )                | 3.05 (1H, <i>dd</i> , $J = 7.6, 8.0$ Hz, H-5)                |
| 6a                           | 1.48 ( <i>m</i> )                | 2.18 ( <i>m</i> )                                            |
| 6b                           | 1.82 ( <i>m</i> )                | 1.77 ( <i>m</i> )                                            |
| 7                            | 3.95 ( <i>m</i> )                | 4.15 ( <i>m</i> )                                            |
| 8                            | 1.69 ( <i>m</i> )                | 1.91 (1H, <i>m</i> )                                         |
| 9                            | 2.04 ( <i>m</i> )                | 2.11 (1H, <i>m</i> )                                         |
| 10                           | 0.94 ( <i>d</i> , $J = 6.6$ )    | 1.06 ( <i>d</i> , $J = 7.2$ )                                |
| 1'                           | 4.46 ( <i>d</i> , $J = 7.8$ )    | 4.79 ( <i>d</i> , $J = 8.4$ )                                |
| 2'                           | 2.93 ( <i>m</i> , $J = 6.6$ )    | 3.28 ( <i>t</i> , $J = 8.4, 9.2$ )                           |
| 3'                           | 3.45 ( <i>m</i> )                | 3.50 ( <i>t</i> , $J = 9.2$ )                                |
| 4'                           | 3.18 ( <i>m</i> )                | 3.40 ( <i>t</i> , $J = 9.2, 9.6$ )                           |
| 5'                           | 3.56 ( <i>m</i> )                | 3.48 (1H, <i>m</i> , H-5')                                   |
| 6'a                          | 3.80 ( <i>m</i> )                | 3.91 (1H, <i>dd</i> , $J = 1.6, 12.4$ , H-6'a)               |
| 6'b                          | 3.87 ( <i>m</i> )                | 3.72 ( <i>dd</i> , $J = 6.0, 12.4$ )                         |

Supplementary Figure 2.  $^{13}\text{C}$  NMR spectrum of isolated active constituent from *Strychnos potatorum* seeds.

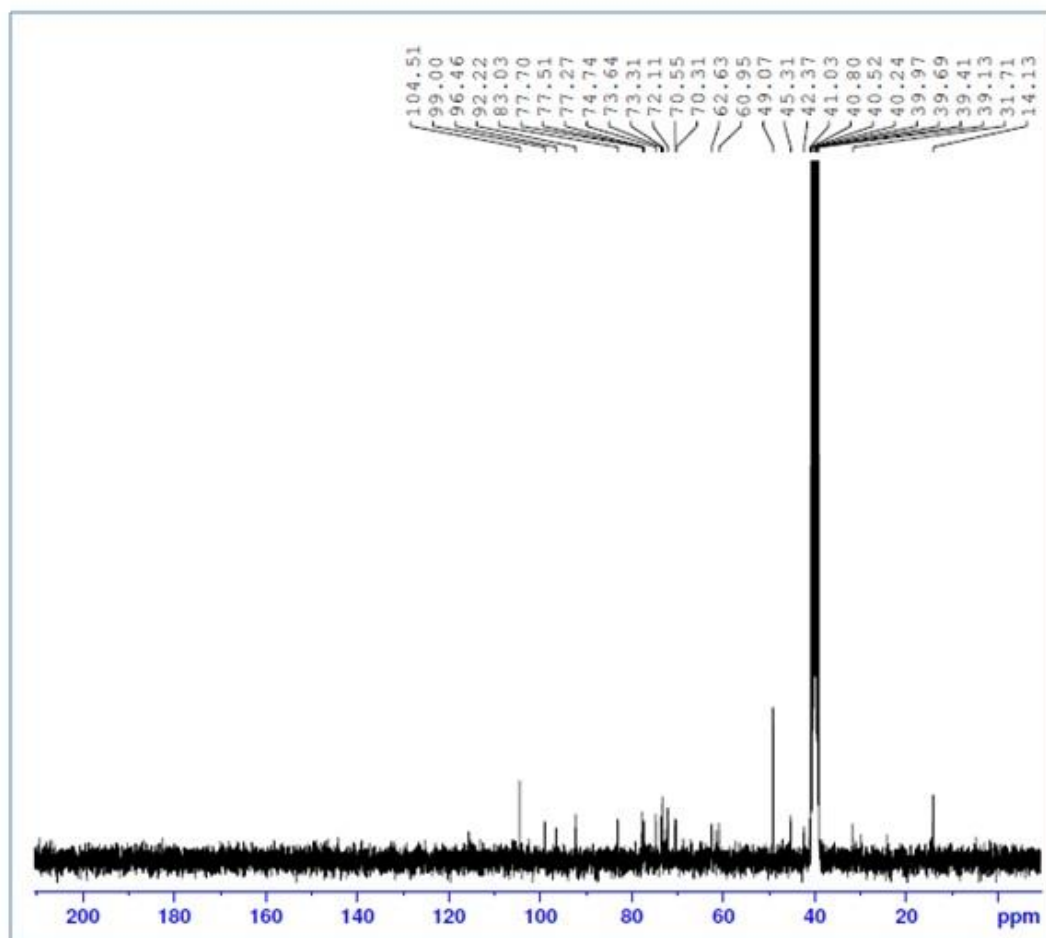

| $^{13}\text{C}$ Position<br>(loganic acid) | $\delta\text{C}$ results of our study | $\delta\text{H}$ results of previous study<br>(Zhang et al., 2003) |
|--------------------------------------------|---------------------------------------|--------------------------------------------------------------------|
| C-1                                        | 92.2                                  | 99.2                                                               |
| C-3                                        | 153.2                                 | 153.5                                                              |
| C-4                                        | 115.6                                 | 116.1                                                              |
| C-5                                        | 31.7                                  | 32.5                                                               |
| C-6                                        | 42.3                                  | 42.9                                                               |
| C-7                                        | 77.2                                  | 77.1                                                               |
| C-8                                        | 42.8                                  | 42.7                                                               |
| C-9                                        | 49.0                                  | 47.7                                                               |
| C-10                                       | 14.1                                  | 14.7                                                               |
| C-11                                       | 172.0                                 | 174.3                                                              |
| C-1'                                       | 104.5                                 | 101.2                                                              |
| C-2'                                       | 73.3                                  | 75.3                                                               |
| C-3'                                       | 77.2                                  | 78.3                                                               |
| C-4'                                       | 70.5                                  | 72.2                                                               |
| C-5'                                       | 77.7                                  | 79.0                                                               |
| C-6'                                       | 62.6                                  | 63.3                                                               |
